# Supplementary material for: Limited Effect of Dehydrating via Active vs. Passive Heat Stress on Plasma Volume or Osmolality, Relative to the Effect of These Stressors per Se
Source: MDPI journal article supplement (doi:10.3390/nu15040904), 2023-02-10
Supplement: s1 [file s1]

Table S1. Pre-trial values of hydration-related variables before Passive heat stress ( $P_{-}$ ; 40°C, 60% RH), or Active heat stress ( $A_{-}$ ; 4-min bouts at ~90% HRmax in a temperate environment; 29.5°C, 50% RH), in which fluid intake was negligible (DEH) or matched to prevent any change in body mass (EUH).

|                       | Trial         |               |               |               |
|-----------------------|---------------|---------------|---------------|---------------|
|                       | P_DEH         | A_DEH         | P_EUH         | A_EUH         |
| Pre BM (kg)           | 74.6 ± 13.3   | 74.2 ± 14.6   | 74.1 ± 13.5   | 74.7 ± 13.6   |
| Hct (%)               | 44 ± 4        | 45 ± 4        | 45 ± 5        | 45 ± 4        |
| [Hb] (g/L)            | 15.6 ± 1.4    | 16.0 ± 1.2    | 15.8 ± 1.5    | 15.6 ± 1.2    |
| $P_{osm}$ (mOsmol/kg) | 277 ± 6       | 278 ± 8       | 280 ± 4       | 276 ± 5       |
| $U_{SG}$              | 1.013 ± 0.009 | 1.013 ± 0.007 | 1.019 ± 0.004 | 1.014 ± 0.004 |
| Thirst (1-9)          | 2.1 ± 0.7     | 2.0 ± 0.8     | 2.5 ± 1.3     | 2.3 ± 1.3     |
| TS (1-13)             | 6.9 ± 1.7     | 7.8 ± 1.1     | 7.6 ± 1.4     | 7.1 ± 0.6     |
| TD (1-10)             | 1.7 ± 1.7     | 1.2 ± 1.1     | 1.8 ± 1.5     | 1.1 ± 0.3     |

*Pre BM: Pre-trial body mass; Hct: Haematocrit; [Hb]: haemoglobin concentration;  $P_{osm}$ : plasma osmolality;  $U_{SG}$ : urine specific gravity; TS: thermal sensation; TD: thermal discomfort.  $P_{DEH}$ : Passive heat stress DEHydration;  $A_{DEH}$ : Active heat stress DEHydration;  $P_{EUH}$ : Passive heat stress EUHydration;  $A_{EUH}$ : Active heat stress EUHydration. Data are Mean ± SD for N = 12.*

Table S2. Environmental conditions before, during and after passive and active dehydration with and without water intake matched to replace any loss of body mass.

|                        | Trial      |            |            |            |
|------------------------|------------|------------|------------|------------|
|                        | P_DEH      | A_DEH      | P_EUH      | A_EUH      |
| Baseline temp. (°C)    | 23.4 ± 2.1 | 24.2 ± 1.5 | 23.5 ± 1.1 | 23.0 ± 1.1 |
| RH (%)                 | 34 ± 9     | 31 ± 8     | 33 ± 7     | 32 ± 6     |
| Trial temp. (°C)       | 40.0 ± 0.0 | 29.5 ± 0.1 | 40.0 ± 0.0 | 29.5 ± 0.2 |
| RH (%)                 | 60 ± 1     | 48 ± 7     | 60 ± 0     | 50 ± 0     |
| Rehydration temp. (°C) | 26.7 ± 1.7 | 25.2 ± 1.1 | 26.9 ± 1.2 | 25.4 ± 1.2 |
| RH (%)                 | 40 ± 4     | 34 ± 3     | 37 ± 4     | 33 ± 6     |

*RH: relative humidity; P\_DEH: Passive heat stress DEHydration; A\_DEH: Active heat stress DEHydration; P\_EUH: Passive heat stress EUHydration; A\_EUH: Active heat stress EUHydration*  
*Data are Mean ± SD for N = 12.*

*Table S3. Intake of macronutrients during 2-h rehydration period following Passive and Active heat stress entailing DEHydration or EUHydration via water intake to replace  $\Delta$ BM.*

|                            | <b>Trial</b>   |                |                |                |
|----------------------------|----------------|----------------|----------------|----------------|
|                            | P_DEH          | A_DEH          | P_EUH          | A_EUH          |
| Total Energy Intake (kJ)   | 2470 $\pm$ 652 | 2462 $\pm$ 802 | 1818 $\pm$ 481 | 2044 $\pm$ 635 |
| Total Energy Intake (kcal) | 591 $\pm$ 156  | 589 $\pm$ 192  | 435 $\pm$ 115  | 489 $\pm$ 152  |
| Total CHO (g)              | 94 $\pm$ 37    | 92 $\pm$ 44    | 57 $\pm$ 28    | 69 $\pm$ 36    |
| <i>Ad libitum</i> CHO (g)  | 56 $\pm$ 37    | 53 $\pm$ 44    | 19 $\pm$ 28    | 31 $\pm$ 36    |
| Total Fat (g)              | 15.8 $\pm$ 0   | 15.8 $\pm$ 0   | 15.8 $\pm$ 0   | 15.8 $\pm$ 0   |
| Total Protein (g)          | 15.2 $\pm$ 0   | 15.2 $\pm$ 0   | 15.2 $\pm$ 0   | 15.2 $\pm$ 0   |

*P\_DEH: Passive heat stress; DEHydration; A\_DEH: Active heat stress DEHydration; P\_EUH: Passive heat stress EUHydration; A\_EUH: Active heat stress EUHydration. Data are Mean  $\pm$  SD for N = 12.*
